# Supplementary material
Source: publisher site journal article supplement (https://www.dovepress.com/article/256272)
Supplement: Supplementary file 1 [file get_supplementary_file.php]

**Supplemental Online Appendix:**

***Questionnaire***

**Part- Ⅰ: socio-demographics:**

1. Age: …………year
2. Gender: a) Male b) Female
3. Marital status: a) Married b) Single
4. Education: a) Illiterate b) Primary

c) Secondary d) Higher secondary

e) More than higher secondary (Grad 12+)

1. Occupation: a) Student b) Service

c) Business d) Homemaker

e) Others:

1. Region: a) Muslim b) Non-Muslim
2. Suffering from any chronic illness: a) Yes b) No

**Party- ⅠⅠ: common diseases and care seeking attitudes:**

1. Did you suffer from acute or chronic illness in preceding two months?
2. Yes b) No
3. What type illness it was?

…………………………………………..

1. What types of measures had you taken for managing your illness?

a) Treatment at healthcare institutions

b) Rest and wait for relief (no actions taken)

c) Practicing self-medication

**Part- ⅠⅠⅠ: sources and motives of self-medication:**

1. If practiced self-medication, what was the source of information on self-medication?

a) Drugstores

b) Previous knowledge/ prescription

c) Friends/relatives

d) Mass media (i.e., TV, Newspaper etc.)

e) Internet (i.e., Social media)

1. **What was the reason of conducting self-medication?**
   a) Inadequate medical services near residence
2. Dissatisfaction with near healthcare services
3. Cost of consultation with doctor
4. Thought of illness as simple
5. Lack of time
6. Urgency of illness
